# Supplementary material
Source: PubMed Central journal article supplement (PMC5589060)
Supplement: mmc1.pdf [file mmc1.pdf]

YMTHE, Volume 25

## **Supplemental Information**

**Targeting miR-21 with Sophocarpine Inhibits**

**Tumor Progression and Reverses Epithelial-**

**Mesenchymal Transition in Head and Neck Cancer**

**Wei Liu, Beilei Zhang, Guo Chen, Wenjiao Wu, Lin Zhou, Yaru Shi, Qi Zeng, Yanqiu Li, Youwei Sun, Xingming Deng, and Fu Wang**

## Supplemental Information

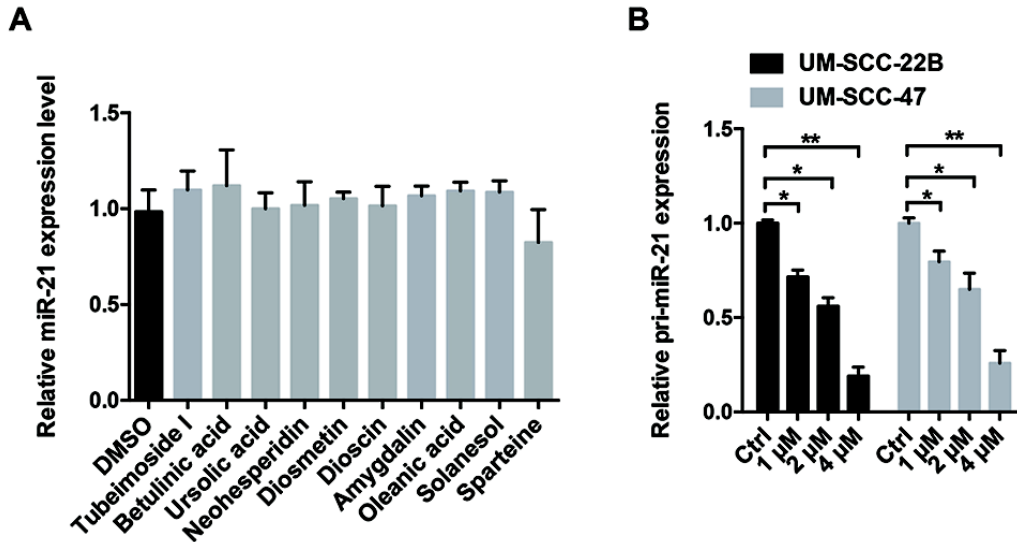

**Figure S1.** (A) UM-SCC-22B was treated with 10 different natural agents (4  $\mu$ M) as indicated for 48 h. Then real-time PCR was performed to detect the expression of miR-21. (B) UM-SCC-22B or UM-SCC-47 cells were treated with increased concentrations of SC and the relative miR-21 expression level was detected using real-time PCR assay. Data are shown as mean  $\pm$  SD of three independent experiments. \* $P < 0.05$ , \*\* $P < 0.01$  compared with DMSO control.

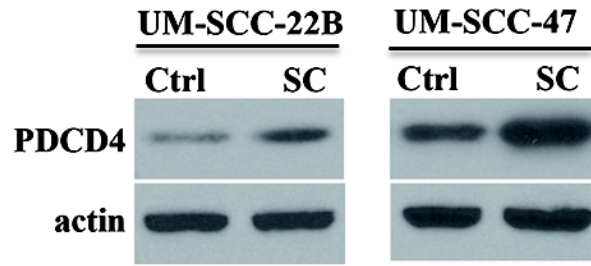

**Figure S2.** UM-SCC-22B or UM-SCC-47 cells were treated with SC (4  $\mu$ M) or DMSO for 48 h. Western blot assay was performed to detect the protein expressions of PDCD4. Actin as used as the loading control.

**Table S1. Primer sequences for qPCR**

| <b>Primer name</b> | <b>Primer sequence (5'-3')</b> |
|--------------------|--------------------------------|
| Vimentin-F         | GACGCCATCAACACCGAGTT           |
| Vimentin-R         | CTTTGTCGTTGGTTAGCTGGT          |
| E-cadherin-F       | CGGTGGTCAAAGAGCCCTTACT         |
| E-cadherin-R       | TGAGGGTTGGTGCAACAACGTCGTTA     |
| Actin-F            | AACAAGAGGCCACACAAATAGG         |
| Actin-R            | CAGATGTACAGGAATAGCCTCCG        |
| U6-F               | CAGGGGCCATGCTAAATCTTC          |
| U6-R               | CTTCGGCAGCACATATACTAAAAT       |
| mir21-F            | GTAGCTTATCAGACTGATGTTGA        |
| mir10a-F           | TACCCTGTAGATCCGAATTTGTG        |
| mir15a-F           | TAGCAGCACATAATGGTTTGTG         |
| mir99a-F           | AACCCGTAGATCCGATCTTGTG         |
| mir124a-F          | TAAGGCACGCGGTGAATGCC           |
| mir155-F           | TTAATGCTAATCGTGATAGGGGT        |
| mir34a-F           | TGGCAGTGTCTTAGCTGGTTGT         |
| mir9-F             | TCTTTGGTTATCTAGCTGTATGA        |
| let7a-F            | TGAGGTAGTAGGTTGTATAGTT         |
